# Supplementary figures and images for: Exploring machine learning methods for absolute configuration determination with vibrational circular dichroism
Source: Royal Society of Chemistry journal article supplement (doi:10.1039/d1cp02428k), 2021-01-01

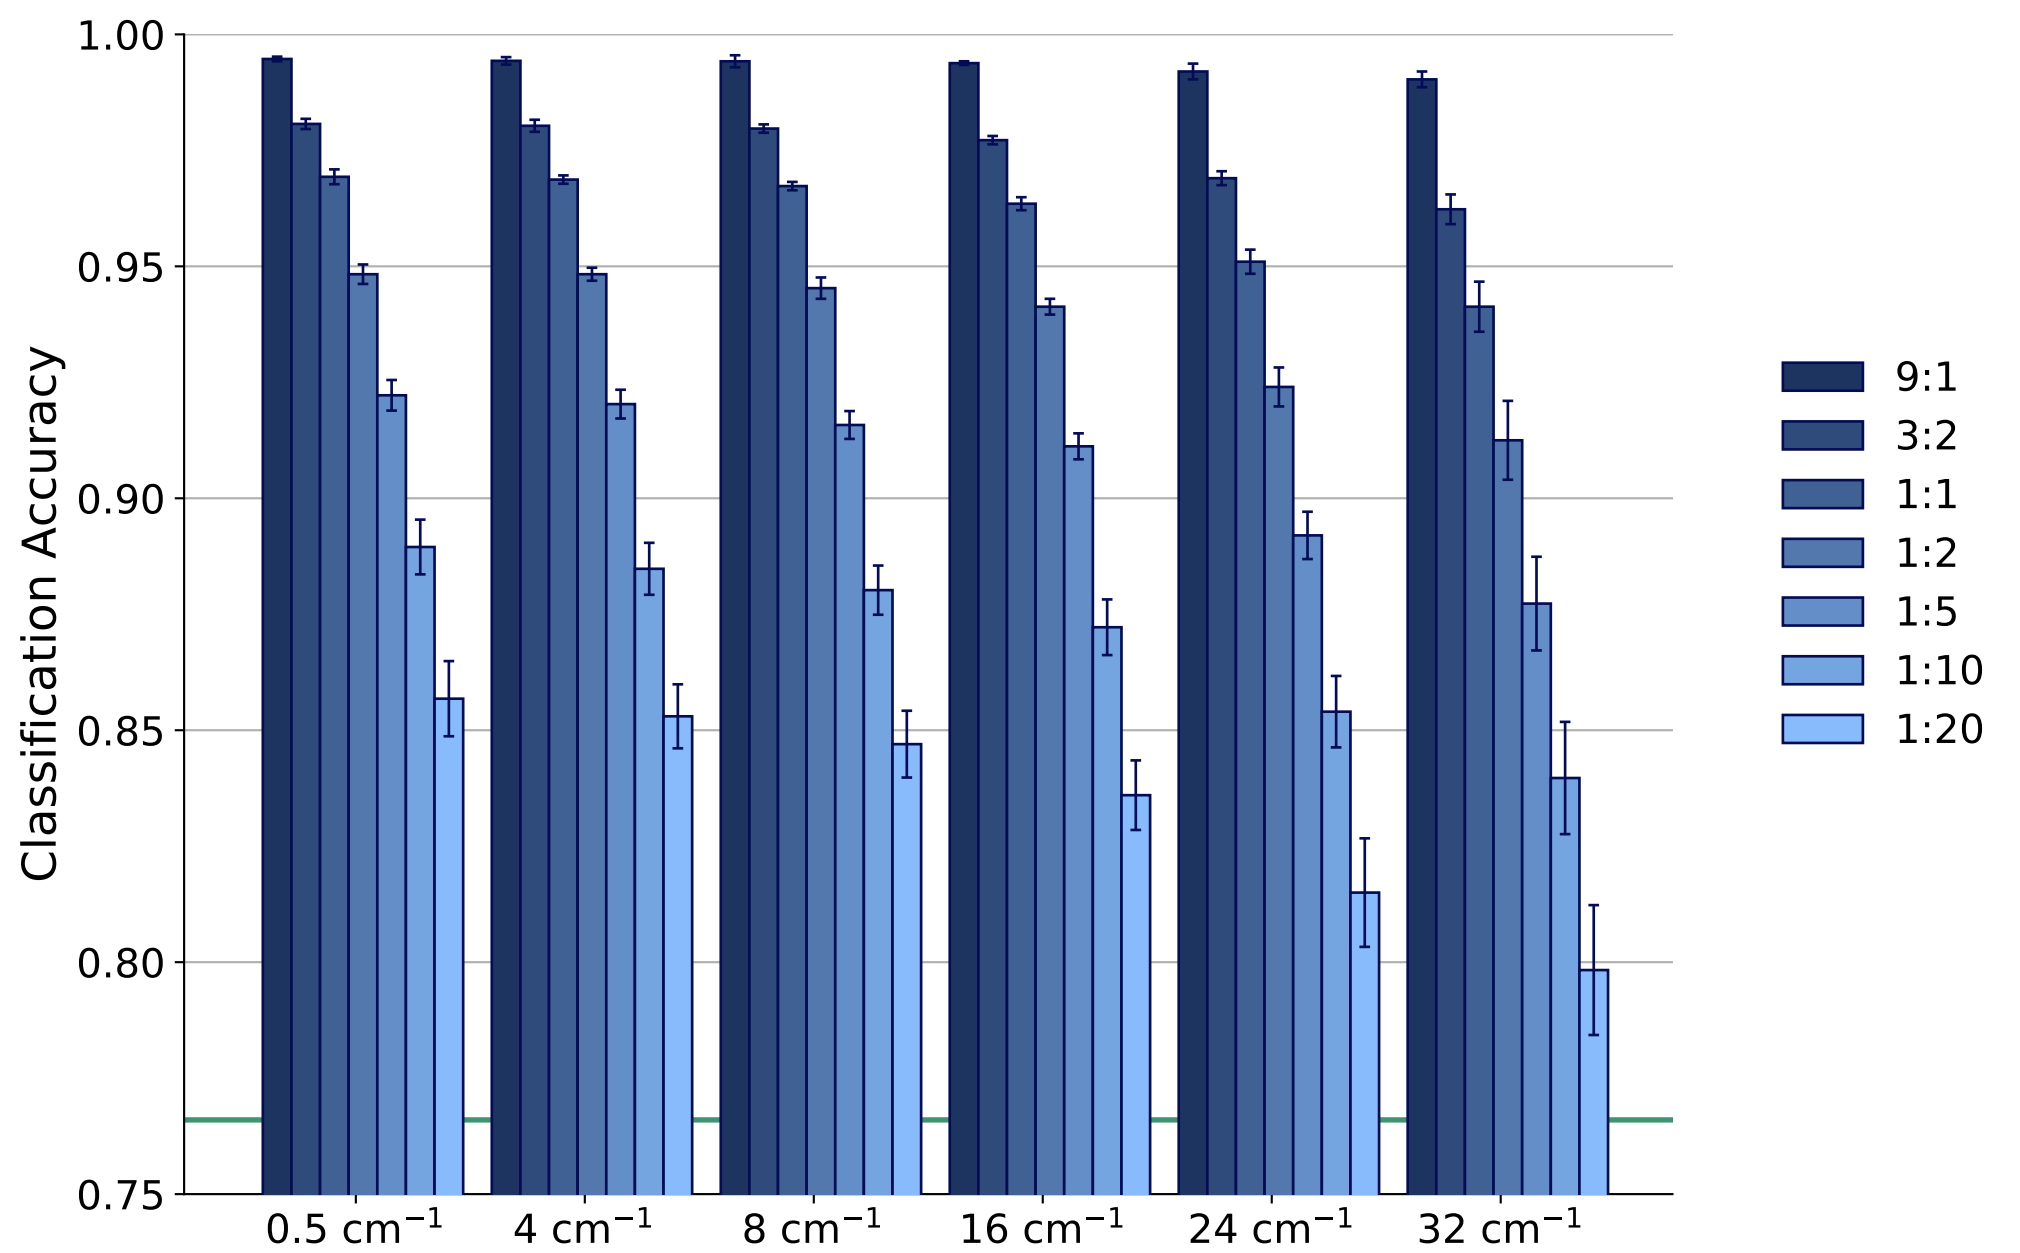

Supplement: d1cp02428k2.zip [file d1cp02428k2.zip]

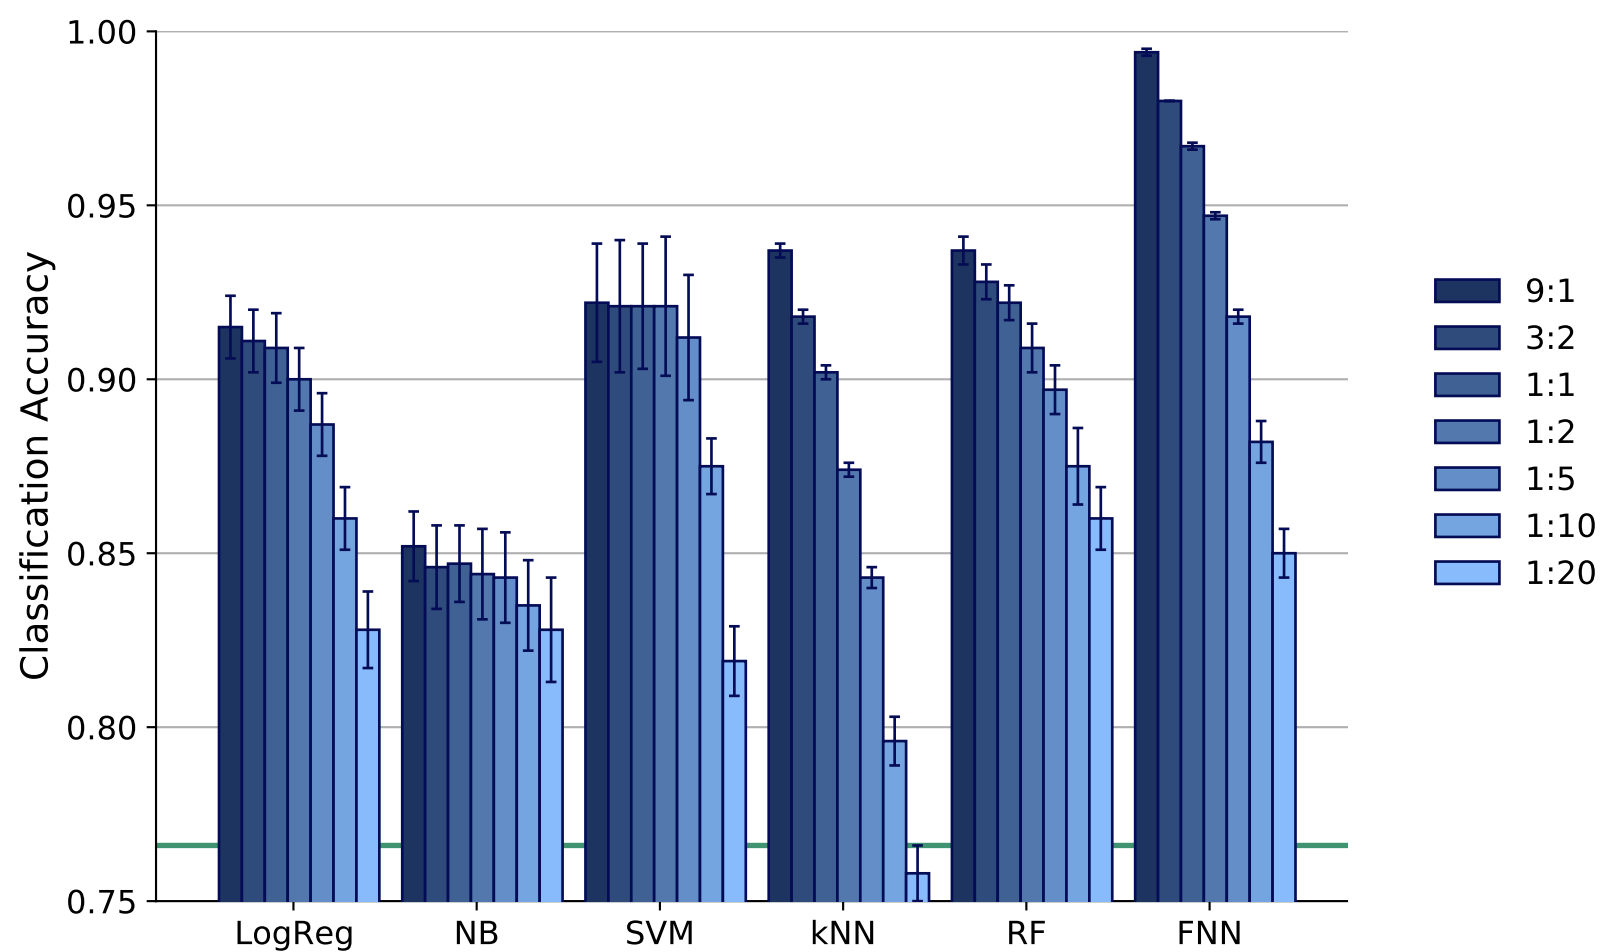

Supplement: d1cp02428k2.zip [file d1cp02428k2.zip]

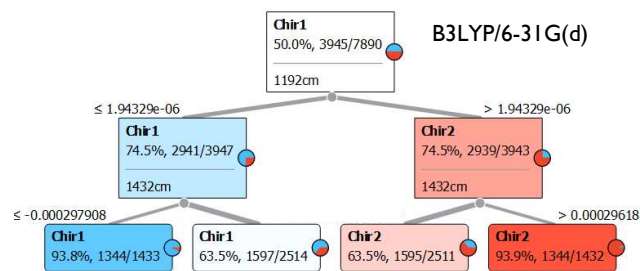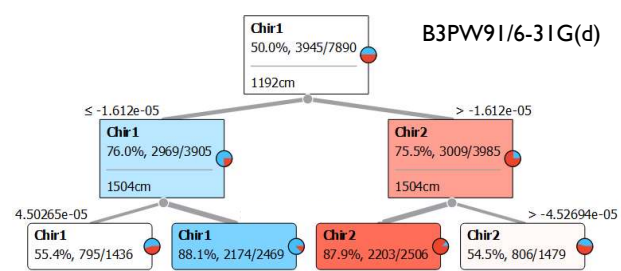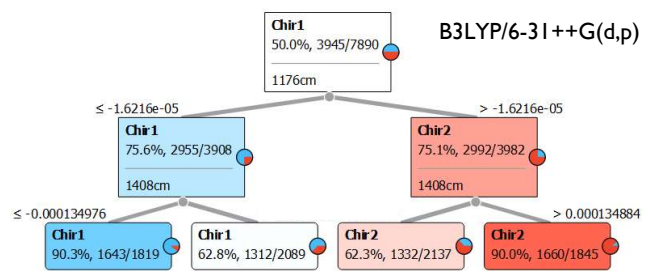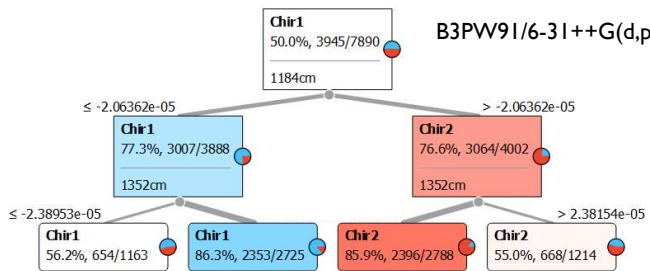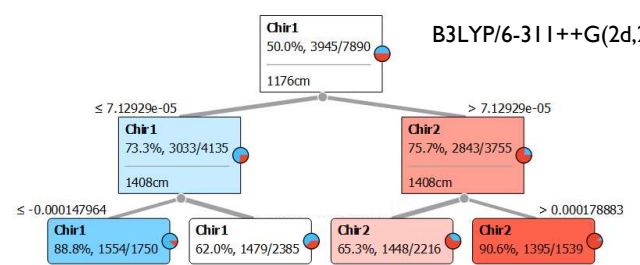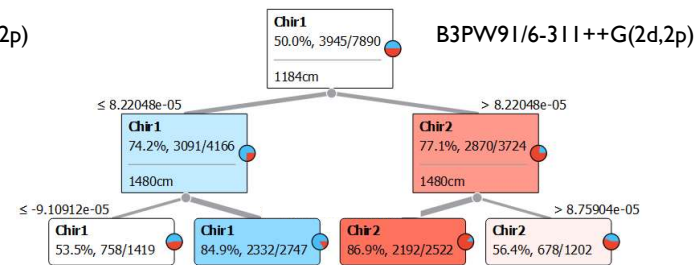

Supplement: d1cp02428k2.zip [file d1cp02428k2.zip]

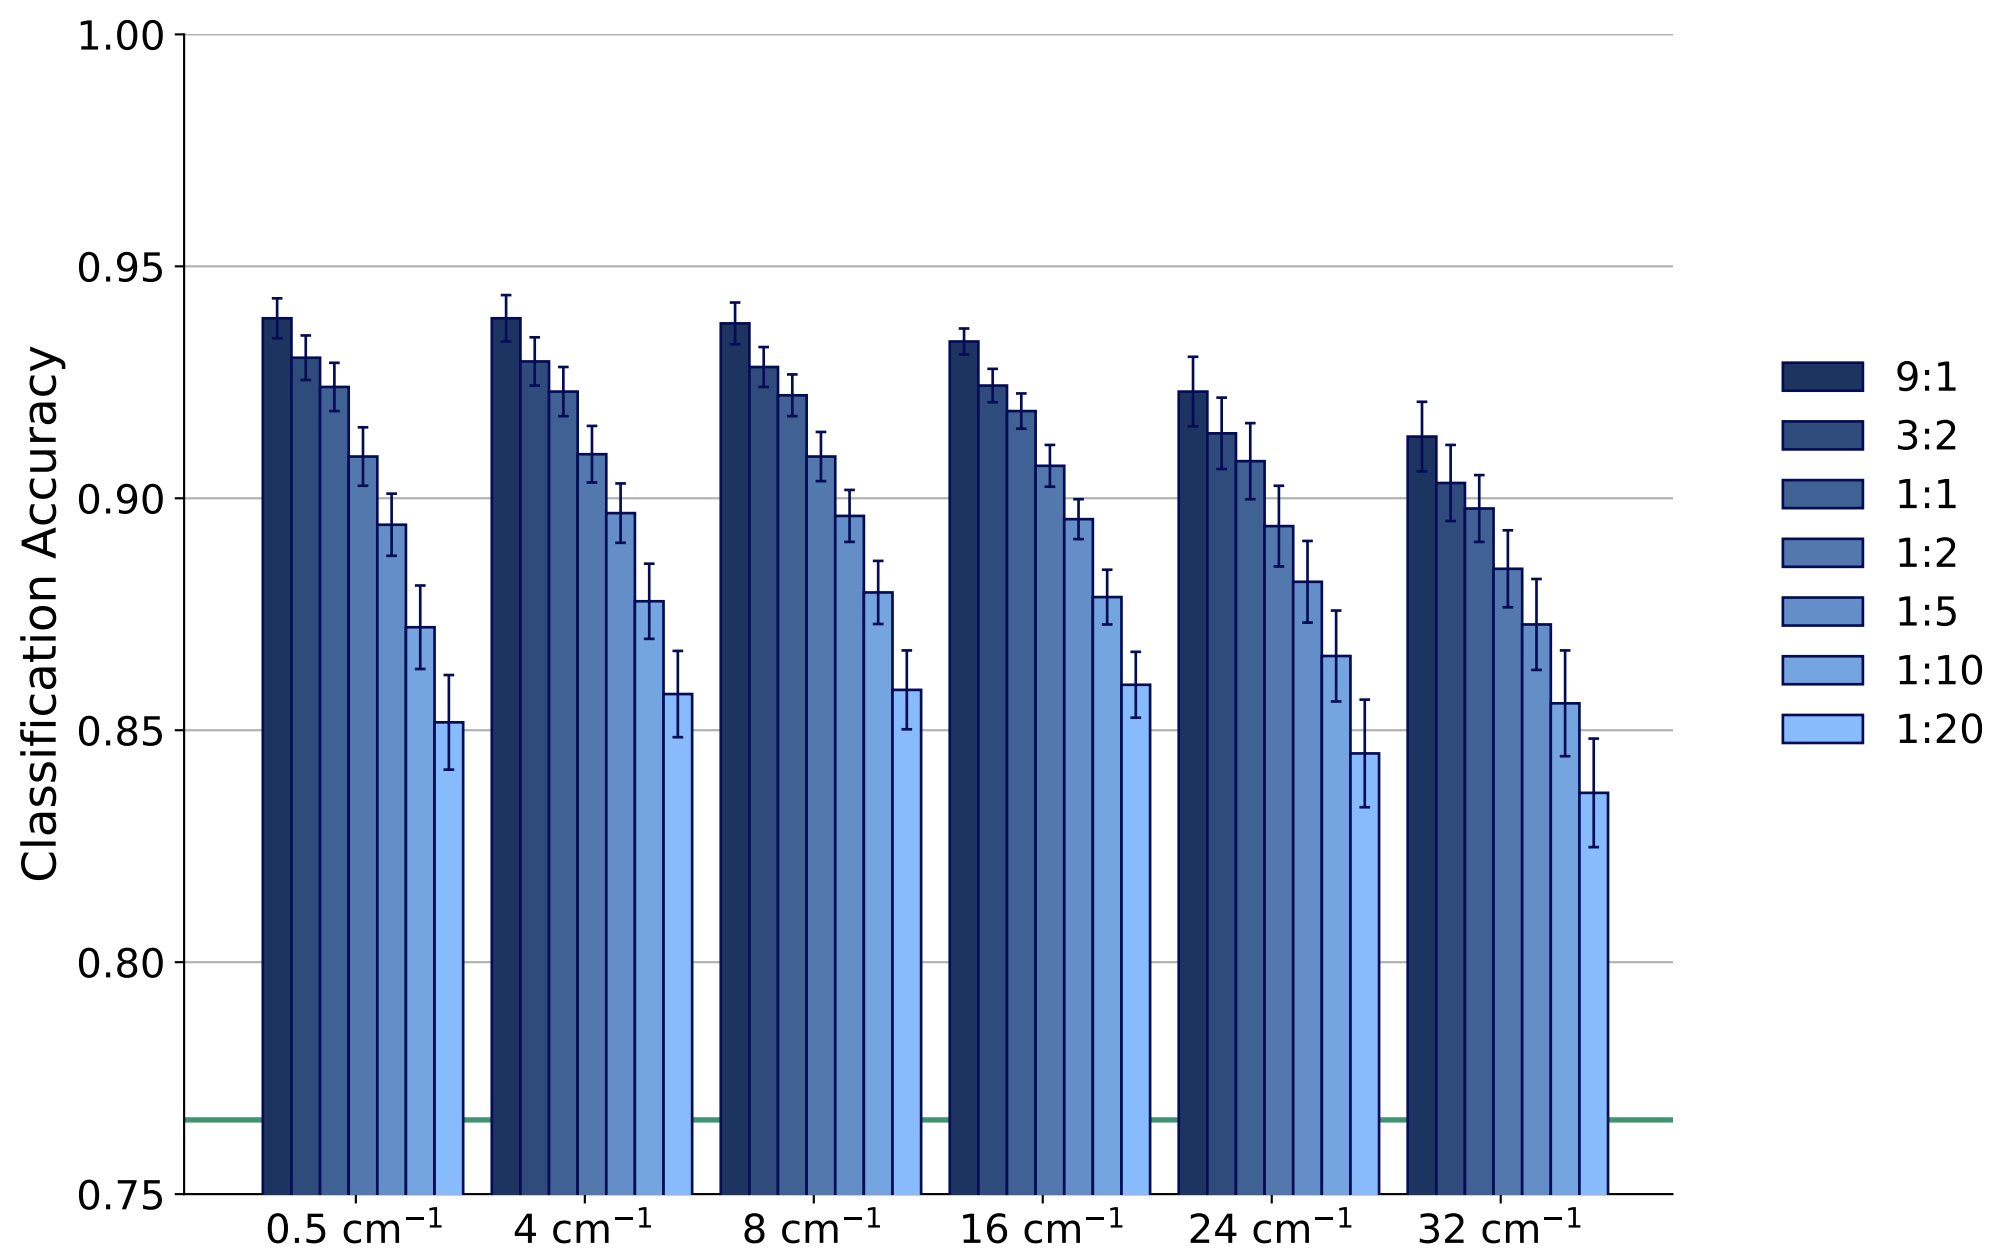

Supplement: d1cp02428k2.zip [file d1cp02428k2.zip]

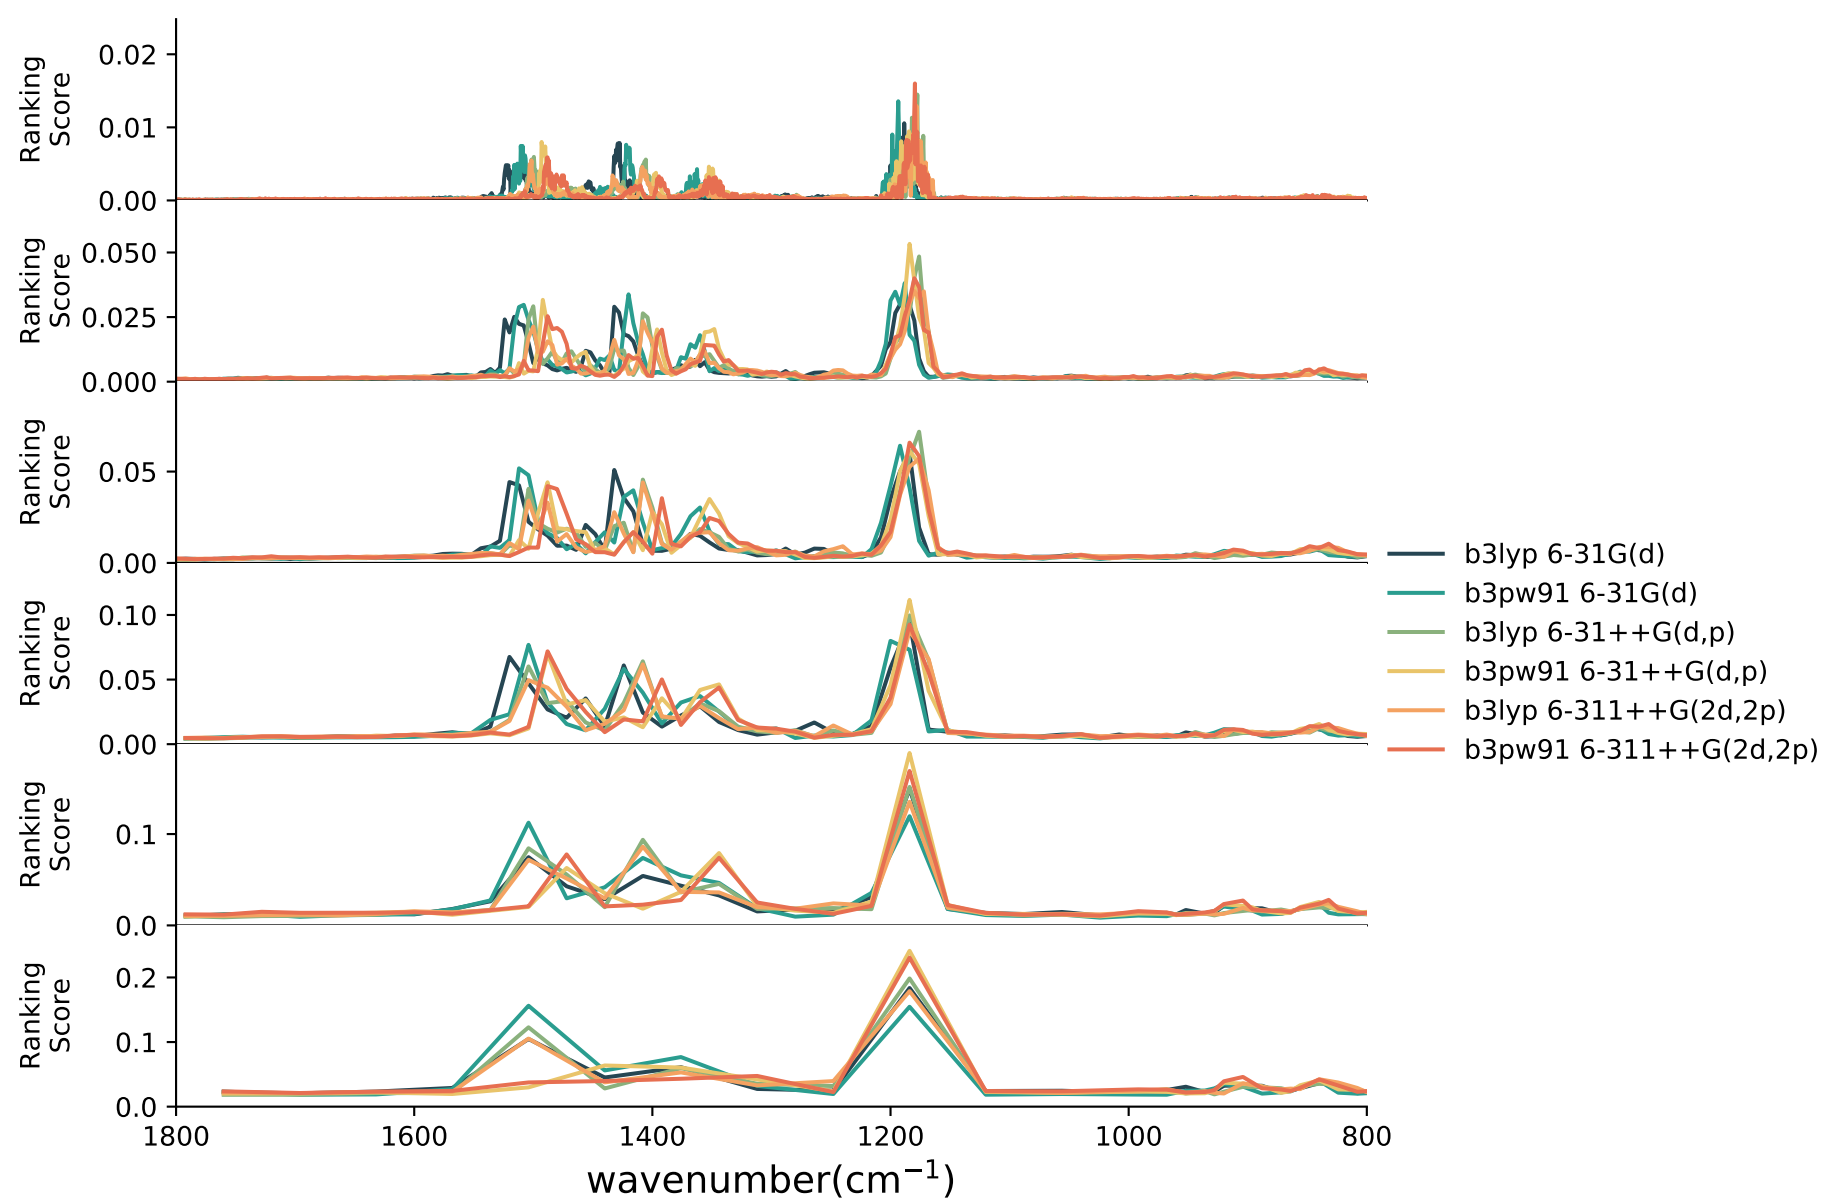

Supplement: d1cp02428k2.zip [file d1cp02428k2.zip]

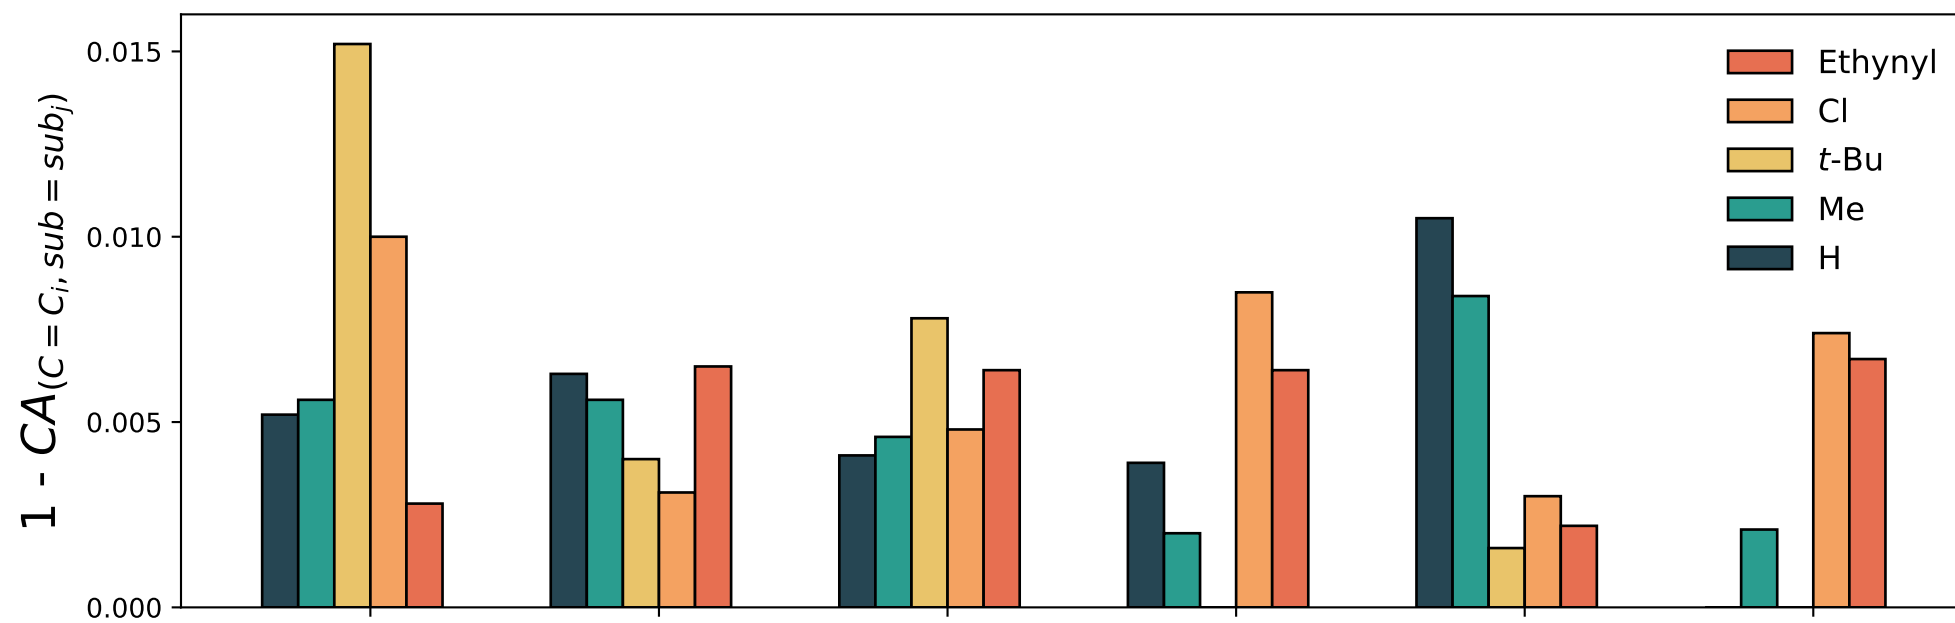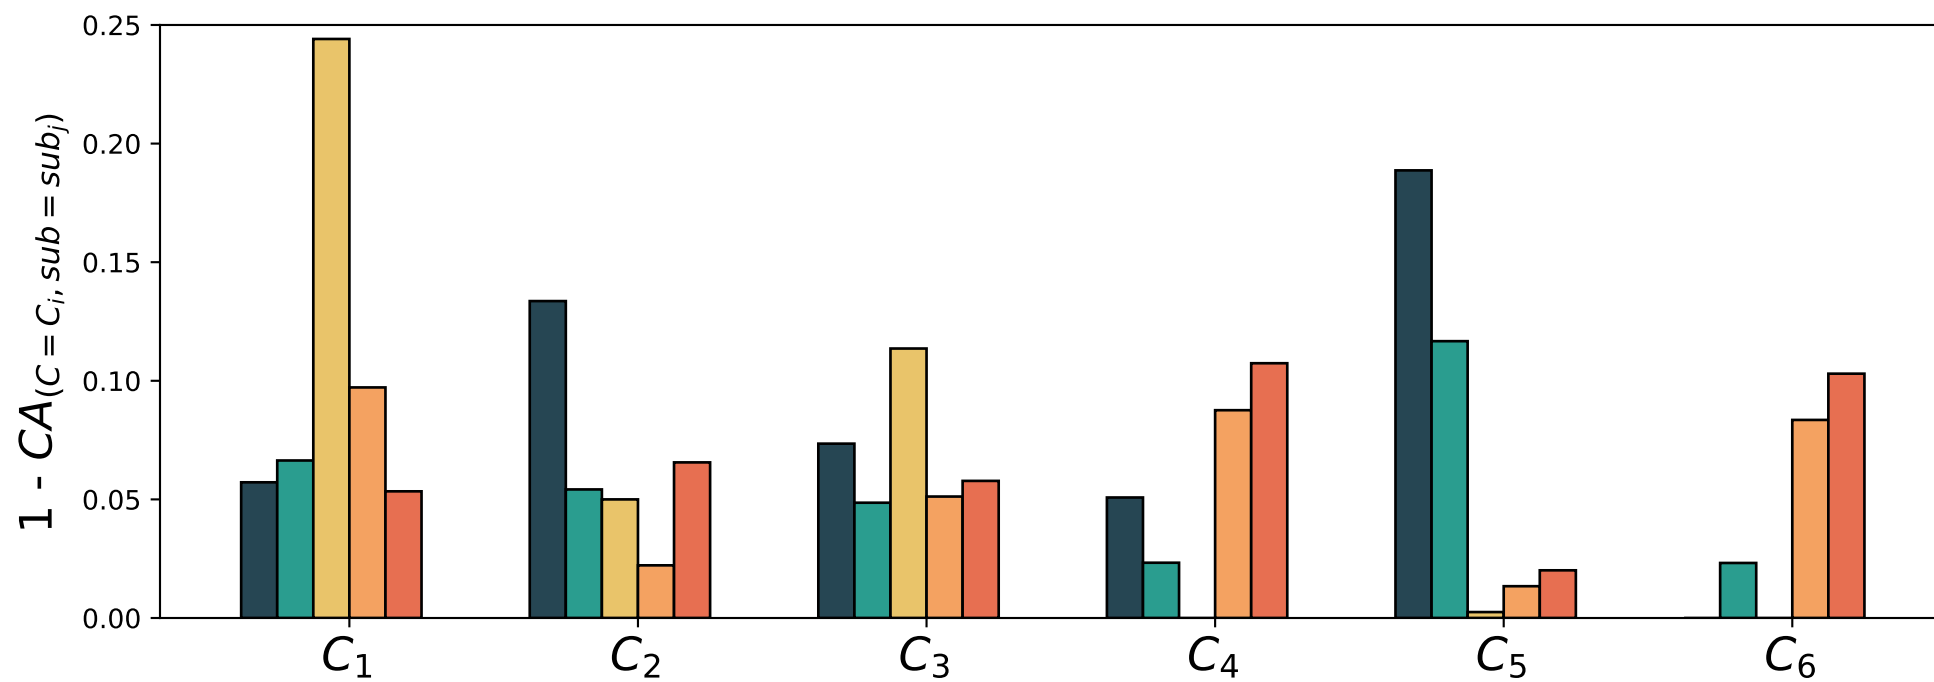

Supplement: d1cp02428k2.zip [file d1cp02428k2.zip]
